# Supplementary material for: Emergent conservation conflicts in the Galapagos Islands: Human-giant tortoise interactions in the rural area of Santa Cruz Island
Source: PLoS One. 2018 Sep 12;13(9):e0202268. doi: 10.1371/journal.pone.0202268 (PMC6135374; doi:10.1371/journal.pone.0202268)
Supplement: S2 Dataset — (XLSX) [file pone.0202268.s008.xlsx]

## Sheet: 2nd phase socio-economic data
S2 Dataset. Second phase socio-economic
	The following table provides the whole data collect during the second phase questionnaire (October-December 2015).
	The dataset was used to estimate the damage and costs to crops and fences
	Not shown (NS) in the data set to avoid potential identifying participant information
Date Collected	Participant number	Age	Gender	Sector	What is your main economic activity?	¿Does the farm border the National Park?	Is it a productive farm (e.g.cattle rearing, crops, timber?	What do you produce?	What are the farm products used for?	How many hectars?	Do giant tortoise enter the farm?	Why do they enter?	Why they do not enter?	Do they cause any dammage?	What do they cause dammage to?		When (in what month (s), season) was the last time you had damage and to what?		For what would you have used the damaged "product"?				Estimate the meters of fences you need in your fields to avoid damage by giant tortoises?	Estimate in monetary terms (USD) how much does it cost to put this fence?	What is this fence used for?				If you previously suffered damage to your fences, how much was the damage in (meters) and monetary terms (USD) per field?		Of these last losses in your lands damaged by tortoises, how much did you loose by the entrance of totoises by area (m2) and monetary terms (USD)?		Crop 1 What was dammaged?	Dammages crop 1	Quality crop 1	Aging stage crop 1	Crop 2 What was dammaged?	Dammages crop 2	Quality crop 2	Aging stage crop 2	Crop 3 What was dammaged?	Dammages crop 3	Quality crop 3	Aging stage crop 3	Crop 4 What was dammaged?	Dammages crop 4	Quality crop 4	Aging stage crop 4	Crop 5 What was dammaged?
															Fences	Crops	Last time, season of damages (month)?	Last time, season of damages (Year) ?	Selling	Own consumption	Protection	Keep cattle			Delimiting	Keep cattle	Protection (e.g. against other cattle entering)	Avoid tortoises entrance	(mts)	(USD)	Crops (m2)	Crops (USD)
NS	1	NS	Male	El Carmen	Giant tortoise tourism farm	Yes	Yes	Papaya, citrus, corn, cattle	Own consumption and specifically sell papayas when there are too many	48	Yes	To feed		No
NS	2	NS	Female	El Occidente	Primary school	Yes	Yes	Cattle rearing	Livestock, occasional sale. Own consumption milk	60	Yes	Because they are move from one place to another		Yes	Yes	Yes	December	2014	Yes	Yes	No	Yes	3000	150	No	Yes	No	No	100	150	NA	NA	Grass	1=<5%	GOOD	Seedling
NS	3	NS	Male	El Occidente	Municipality cadastre	No	Yes	Yucca and green	Yucca and green plantain for own consumption	1	No		Because they opened the road and they do not go up anymore. Previously they used to go up more or less from 1997 until 2001	No
NS	4	NS	Male	Guayabillos	Aluminum and glass	Yes	Yes	coffee	Cafe for own consumption	4	Yes	Because there are water ponds and food		No
NS	5	NS	Female	El Occidente	Lumber trees and cattle for meat and milk	Yes	Yes	Wood, livestock	Wood is for sale as well as meat and milk	40	Yes	It has to do with the weather		Yes	Yes	No	NA	NA	No	No	No	Yes	40	408	No	Yes	No	No	6	0
NS	6	NS	Male	Guayabillos	Lawyer	No	Yes	Coffee, pineapple, barraganete	Coffee, pineapple and platain to sell	1.5	Yes	I imagine because of the vegetation and to eat. There is a water pond, and I was thinking of expanding it so that tursitas can come		No
NS	7	NS	Male	Occidente	farming	No	Yes	Pineapple, yucca, corn, papaya	Own consumption and also sell some	2	Yes	Walking and eating crops of the farm		Yes	Yes	Yes	November	2015	Yes				40	5000	Yes	Yes	Yes	Yes	2	0	3	24	Pineapple	1=<5%	GOOD	Intermediate
NS	8	NS	Male	Santa Rosa	Dive tourism	No	Yes	Coffee	Coffee and in future tourism	4	Yes	They like the shade and the grass, also guayba fruit and also because they are free		No
NS	9	NS	Female	Santa Rosa	Tourism in the port and on the farm have caffe	No	Yes	Corn, yucca, plantain	Selling	3	Yes	It's their area,		No
NS	10	NS	Female	El Occidente	Driver the grandfather, grandmother agriculture, the woman helps on the farm, stylist	Yes	Yes	Yuca, sapallo, cabbage	Crops for sell, cattle for own consumption	1	Yes	To feed		Yes	No	Yes	August	2015	No	Yes	No	No	0	0	No	Yes	No	No	0	0	10000	100	Yucca	6=>80%	GOOD	Mature	Pumpkin	2=6-10%	MEDIUM	Seedling	Cabbage, Parsley, Lettuce	6=>80%	GOOD	Seedling
NS	11	NS	Female	Santa Rosa	Public employee, on the farm won	No	Yes	Pineapples and livestock	I sell cattle, but crops are for my own consumption	5	Yes	To feed		Yes	Yes	Yes	November	2015	No	Yes	No	No	0	0	No	Yes	No	No	3	NA	15	0	Pineapple	2=6-10%	GOOD	Seedling
NS	12	NS	Male	El Carmen	tourism	Yes	Yes	Cattle raising	Sell cattle	75	Yes	Natural migration, for food and water		Yes	Yes	Yes	November	2010	Yes	Yes	No	No	0	0	No	No	No	Yes	NA	NA			coffee	1=<5%	MEDIUM	Seedling
NS	13	NS	Female	Santa Rosa	Teacher	No	Yes	Banana, banana	Own consumption	5	Yes	They have always been here		Yes	No	Yes	May	2015	No	Yes	No	No	0	0	No	No	Yes	No	NA	NA	20	NA	Guineo	3=11-20%	GOOD	Intermediate
NS	14	NS	Female	Santa Rosa	Secretary	No	Yes	Livestock, corn	Own consumption	5	Yes	They do not respect the fencing		Yes	Yes	Yes	November	2012	No	Yes	No	No	0	0	No	No	Yes	No	NA	NA	20	NA	Corn	1=<5%	GOOD	Seedling
NS	15	NS	Female	Santa Rosa	Retired before trade	No	Yes	Cattle rearing	Cattle meat and milk	44	Yes	They come from the other farms		Yes	Yes	No	NA	NA	No	No	No	Yes	0	0	Yes	Yes	No	No	8	40			Grass	3=11-20%	GOOD	Seedling
NS	16	NS	Female	Entre El Occidente Y Los Guayabillos	Supermarket trade	No	NA	NA	Some I sell, some I use	0.5	Yes	I do not have my farm enclosed with fences		No
NS	17	NS	Male	El Occidente	Farmer	Yes	Yes	Cattle rearing	Sell ​​for village in stores or at the fair	10	Yes	Pasture and food		No
NS	18	NS	Male	Guayabillos	Naturalist guide	Yes	Yes	Citrus, papaya, banana, banana	I sell otherwise its tortoise food	3.5	Yes	To feed		No
NS	19	NS	Male	El Occidente	Commerce	No	No	NA	Its a habbitable and recreational house	6	No		it is not the zone	No
NS	20	NS	Male	El Carmen	Mega-supermarket Supermarket	Yes	Yes	Cattle rearing	Cattle rearing	60	Yes	Because it's their area and we have a pond		Yes	Yes	No	November	2015	No	No	No	Yes	0	1500	No	Yes	No	No	NA	1500	2	0
NS	21	NS	Male	Salasaca	Tourism, travel agency	No	Yes	Coffee, banana	Own Consumption	10	Yes	Because they are on the way and they feed		Yes	No	Yes	November	2013	No	Yes	No	No	230	350	No	No	No	Yes	NA	NA	4000	30	Banana	6=>80%	GOOD	Seedling
NS	22	NS	Female	El Occidente	Housewife	Yes	Yes	Pineapples, bananas, pumpkins, watermelons, and livestock (5 cows)	For my parents I sell fruits and vegetables and we have 5 cows for sale	6	Yes	I imagine why they want to eat, they are the owners but we also live here.		Yes	Yes	Yes	May	2015	No	Yes	No	No	400	280	No	No	No	Yes	10	30	10	70	Pineapple	2=6-10%	GOOD	Intermediate	Watermelon	4=21-50%	GOOD	Mature
NS	23	NS	Male	Guayabillo	Pineapple production	No	Yes	Pineapple	Selling and family consumption	33	Yes	They come in the hot season, because tin heir sectornothing to eat or drink, so they start to come to the higher parts of the island		Yes	Yes	Yes	November	2015	Yes	Yes		No	1500	4500				Yes	NA	NA	20	120	Pineapple	1=<5%	MEDIUM	Intermediate
NS	24	NS	Male	Guayabillo	Retired	No	Yes	Citrus and livestock	Sale of cattle meat and citrus consumption	30	Yes	To look for food		Yes	Yes	No	November	2014	No	No	Yes	No	3000	50	No	No	Yes		50	NA	NA	NA
NS	25	NS	Male	Guayabillos	Livestock (50 cows) and agriculture	No	Yes	Cattle rearing	Own consumption and sale	30	Yes	For water		Yes	Yes	No	November	2014	No	No	Yes	No	400	700				Yes	50	80	NA	NA
NS	26	NS	Male	El Carmen a 12km	Wood, chickens	Yes	Yes	Wood, chickens	Sell timber and chickens	53	Yes	To visit and something to eat		Yes	Yes	Yes	November	2009	Yes	Yes	No	No				Yes			NA	NA	NA	NA
NS	27	NS	Male	Santa Rosa	Livestock more and a little agriculture	No	Yes	Corn, banana	Sale crops to MAG and a part is for own consumption	78	Yes	For the food where where there is cattle		Yes	Yes	Yes	November	2015	Yes	No	No	No	1500	390		Yes	Yes		NA	NA	30	30	Corn	1=<5%	GOOD	Intermediate	Banana	1=<5%	GOOD	Seedling
NS	28	NS	Male	Santa Rosa	Taxi driver	No	Yes	Banana banana plantain, but has stopped working 2 years ago	Little sell	22	Yes	They used to go up-around because before it was full of blackberry and areas they could not pass. Now it's clean and they can pass through		Yes	Yes	Yes	December	2007	Yes	No	No	No	00	00	No	No	No	No	NA	NA	500	375	Corn	4=21-50%	GOOD	Mature	Pineapple	3=11-20%	GOOD	Mature	Watermelon	3=11-20%	GOOD	Mature
NS	29	NS	Female	El Carmen	Tourism, and consulting	No	Yes	Coffee, banana, green, pineapples, avocado, papayas. In smaller quantities other things depending on the time. If they had legumbras, lettuce, radishes, carrots, tomatoes.	Sale and own consumption	18	Yes	Because we are in the middle of their migration territory, in the highest part of the island. Giant tortoises go down to nesting and go up and down for food.		Yes	Yes	Yes	December	2011	Yes	No	No	No	1000	2500	No	No	No	Yes	NA	NA	6000	6000	coffee	5=51-80%	GOOD	Seedling	Banana	5=51-80%	GOOD	Seedling	Papaya	5=51-80%	GOOD	Seedling	Cat's claw	5=51-80%	GOOD	Seedling
NS	30	NS	Male	Guayabillos	Primary taxi driver, secondary farming	No	Yes	Cattle, coffee, citrus, guinea, yucca	Sale and own consumption	21.75	Yes	For food and also because they have made a few ponds		No
NS	31	NS	Male	El Occidente	Head of a Foundation (NGO)	No	Yes	Guinea orange, tangerine	Own consumption	0.4	Yes	They entered 1 year ago and because the neighbor has giant tortoises and tries to keep them. Tortosies however, apparently escaped from there		No
NS	32	NS	Male	El Occidente	Farming	No	Yes	Banana, banana,	Sale	2	No		Does not know	No
NS	33	NS	Female	El Carmen	I depend on the older son for income	Yes	Yes	Pasture, the children have about 4 cows	Ocassionally selling meat to meet needs and 4 chickens are for family consumption	64	Yes	Because they have water and pastures, then they make mud and bathe here. Because they are treated well, here they stay		Yes	Yes	No	December	2015	No	Yes	No	No		240	No	Yes	Yes	No	NA	240	NA	NA
NS	34	NS	Male	Guayabillos	Selling frozen meat (pigs and Creole chickens) but also timber production	Yes	Yes	Chickens, pigs and sechrios of yucca, green, citrus orange	Sell ​​in the local markets	1	No		Because I fence. Otherwise they would be in my lands	Yes	Yes	No	December	2013	No	Yes	No	No	400	9000	No	No	No	Yes	NA	NA	5000	4000	Corn	6=>80%	GOOD	Intermediate	Yucca	6=>80%	GOOD	Mature	Guineo	6=>80%	GOOD	Seedling	Banana	6=>80%	GOOD	Seedling
NS	35	NS	Female	Guayabillos	Agriculture sometimes and then the rest I stay home	No	Yes	Yucca, green, banana, mai, pineapple, squash, legumes, tomatoes, peppers, oranges, grapefruit, papayas, sour orange	For own consumption and occasional selling when there is enough to sell	7	No		I do not allow them to enter. Once one tortoises entered, but then left	No
NS	36	NS	Male	Santa Rosa	It is just planting but it is its primary activity	No	Yes	coffee and citrus	Just beginning to produce coffee to sell	13	Yes	They enter because they like to eat churuyo (short pasture). They are well at ease, there are about 20 tortoises, only males. It is rare that female enter. They are settled in 5 hectares		No
NS	37	NS	Male	El Carmen	farming	No	Yes	Only yucca when there is plenty	Sell ​​and own consumption	17	Yes	They entered 4 years ago and do not know why		No
NS	38	NS	Female	Guayabillos	Public sector (MAG)	No	No			3	No		Do not know, lands are full of invasive plants	No
NS	39	NS	Female	El Occidente	Consultant	No	No			0.5	Yes	Because it is their natural territory		No
NS	40	NS	Female	Guayabillos	Police station	No	Yes	Fruit trees, poultry farming .. And agriculture for the own consumption, Citrus fruits, pumpkin etc	Own consumption	2	Yes	It could be to feed		Yes	Yes	No	December	2012	No	No	Yes	No	100	00	No	No	No	No	3	NA	NA	NA
NS	41	NS	Male	Guayabillo La Primavera	Construction and agriculture	No	Yes	Guinean, banana, papaya, yucca. Fruit trees, guanabana, 3 coconut bushes. Zapallo, orito	More for own consumption and when there is abundance I sell	0.49	No		It is too far	No
NS	42	NS	Female	Guaybillos	Stylist	No	Yes	Cattle reraring	Moslty milk for sale and sometimes meat	3	Yes	For the water		No
NS	43	NS	Male	Santa Rosa - Salasaca Frente Al Hotel Safari Camp	Agriculture and livestock purchase and sales	Yes	Yes	Plantain, yucca, beans, cattle, pork, chickens.	Own consumption but cheese is sold to a ladyin the village	30	Yes	Because there is food and natural ponds		No
NS	44	NS	Female	El Occidente	Commerce	No	Yes	Legumes, plantains, yucca, sugar cane, pumpkins but depends on the season.	Sale at the fair and here in your store	2	No		Because we have very well fenced	No
NS	45	NS	Female	El Occidente	Tailor shop	No	No			0.1	No		They should be able to enter and pass. Our neighbors have poles and barbed wires so they do not enter	No
NS	46	NS	Male	El Occidente, Pero La Vendio	Work in the municipality	No	No				Yes	Because of the drought, they come here to look for water and food		No
NS	47	NS	Female	El Comote Y El Bosque 8 Ha	Merchant	No	Yes	Livestock and coffee shop	Sale	8	No		Because the MAG has made water containers. The problem is n ot for the tortoises but for the hens because they can drown. 30 years ago one tortoise entered, but we have not seen it again.	No
NS	48	NS	Male	El Carmen	house and flats rentals	No	No			0	Yes	Pbecause, here it is a gorge		No
NS	49	NS	Male	Santa Rosa	Poultry production of eggs and chicken meat	No	Yes	Poultry farming	Sale	8	No		Because it’s the highest part of the island	No
NS	50	NS	Male	Salasaca	I work in little agriculture, little livestock	Yes	Yes	Livestock and a little banana, orange plants, tangerine		57	Yes	For the pasture to feed		Yes	Yes	Yes	December	2015	No	No	Yes	No	0	3740	No	Yes	No	No	200	1000	NA	NA																	Corn
NS	51	NS	Female	Santa Rosa Salasaca	Mini boutique and sale of milk and meat	Yes	Yes	Livestock for meat and milk	Sale	176	Yes	To feed		Yes	Yes	No	Septiembre	2015	No	No	Yes	Yes	8200	00010	Yes		Yes		1200	NA	NA	NA
NS	52	NS	Female	El Carmen	We sold our farm and invested in builiding rooms for rent	No	Yes	pasture for about 8 heads of cattle, but the mayority is rented for other farmers with livestock	Land is rented and there 250 trees of mandarines that produce enough to sale	7	Yes	Because it is clean, not full of blackberry. We have invested in cleaning and that is why they are happy to be here		Yes	Yes	Yes	December	2008	Yes	Yes	No	No	500	800	No	No	No	Yes	NA	300	240	NA	Plantain	6=>80%	GOOD	Intermediate	Corn	2=6-10%	GOOD	Intermediate
NS	53	NS	Female	Santa Rosa	Dive instructor	Does know	Yes	Pasture for horses	No saling, we only have horses	1	No		It is covered with tall grass and fenced. There are no plants they like, like elephant grass	No
[truncated: 8 more columns]
